# Supplementary material
Source: Springer Nature journal article supplement (https://www.springermedizin.de/resource/supplementary/12879_2011_1625_MOESM2_ESM.pdf/9442944)
Supplement: MOESM2 [file 9442944]

**Text**

I joined because of my courage; You have power and not afraid; You sacrifice yourself when you fight for your country; Jesus died on the cross to save others, so I sacrifice myself too

**Codes**

Being courageous  
Role model

**Text**

The vaccine will help other people; I have decided to sacrifice myself to rescue the world; Our main task is to protect lives of people and their properties; Our work is to sacrifice for others

**Codes**

Helping others  
Save the world  
Unselfishness

**Category**

Pride of fulfilment  
and self-respect
